# Supplementary material for: Influencing Factors on the Quality of Lymph Node Dissection for Stage IA Non-Small Cell Lung Cancer: A Retrospective Nationwide Cohort Study
Source: MDPI journal article supplement (doi:10.3390/cancers16020346), 2024-01-13
Supplement: s1 [file s1]

Supplementary Table S1. Patient baseline characteristics of full sample and propensity matched cohort.

|                                               | Full sample          |                          |                     |        |                | Propensity matched cohort |                          |                     |       |                |
|-----------------------------------------------|----------------------|--------------------------|---------------------|--------|----------------|---------------------------|--------------------------|---------------------|-------|----------------|
| Patient Baseline Characteristics <sup>a</sup> | L-SMLND<br>(n =1190) | Non-L-SMLND<br>(n =3081) | Absolute difference | SDM    | <i>p</i> value | L-SMLND<br>(n =1184)      | Non-L-SMLND<br>(n =1184) | Absolute difference | SDM   | <i>p</i> value |
| Age, median (IQR)                             | 66 (IQR: 61 to 70)   | 66 (IQR: 61 to 70)       | 0                   | -0.003 | 0.755          | 66 (IQR: 61 to 70)        | 65 (IQR: 61 to 70)       | 1                   | 0.03  | 0.219          |
| Sex, <i>n</i> (%)                             |                      |                          |                     |        | 0.204          |                           |                          |                     |       | 0.232          |
| Male                                          | 568 (48)             | 1408 (46)                | 2                   | -0.77  |                | 566 (48)                  | 537 (45)                 | 3                   | 0.05  |                |
| Female                                        | 622 (52)             | 1673 (54)                | 2                   | -0.96  |                | 618 (52)                  | 647 (55)                 | 3                   | -0.03 |                |
| CCI, median (IQR)                             | 3 (IQR, 2 to 4)      | 3 (IQR, 2 to 4)          | 0                   | 0.013  | 0.586          | 3 (IQR, 2 to 4)           | 3 (IQR, 2 to 4)          | 0                   | 0.06  | 0.12           |
| ThRCRI, <i>n</i> (%)                          |                      |                          |                     | 0      | 0.856          |                           |                          |                     | 0.07  | 0.09           |
| A                                             | 1012 (85)            | 2610 (84.7)              | 0.3                 |        |                | 1007 (85.1)               | 1061 (89.6)              | 4.5                 |       |                |
| B                                             | 175 (14.7)           | 469 (15.2)               | 0.5                 |        |                | 174 (14.7)                | 123 (10.4)               | 4.3                 |       |                |
| C                                             | 3 (0.3)              | 2 (0.1)                  | 0.2                 |        |                | 3 (0.3)                   | 0                        | 0.3                 |       |                |
| COPD, <i>n</i> (%)                            | 274 (23)             | 542 (18)                 | 5                   | -0.62  | <0.001 *       | 272 (23)                  | 255 (22)                 | 1                   | 0.06  | 0.401          |
| Surgeon's experience, <i>n</i> (%)            |                      |                          |                     | -0.73  | 0.004 *        |                           |                          |                     | 0.004 | 0.934          |
| Initial 50 lobectomies                        | 660 (56)             | 1863 (61)                | 5                   |        |                | 659 (56)                  | 661 (56)                 | 0                   |       |                |
| Later lobectomies (>50)                       | 530 (44)             | 1218 (39)                | 5                   |        |                | 525 (44)                  | 523 (44)                 | 0                   |       |                |
| Type of lobectomy, <i>n</i> (%)               |                      |                          |                     | 0.2    | <0.001 *       |                           |                          |                     | 0.03  | 0.07           |

|                         |            |            |      |  |  |            |            |      |  |  |
|-------------------------|------------|------------|------|--|--|------------|------------|------|--|--|
| Right lower bilobectomy | 13 (0.4)   | 1 (0.1)    | 0.3  |  |  | 0          | 0          | 0    |  |  |
| Right upper bilobectomy | 9 (0.3)    | 5 (0.4)    | 0.1  |  |  | 0          | 0          | 0    |  |  |
| Left lower lobectomy    | 595 (19.3) | 78 (6.6)   | 12.7 |  |  | 78 (6.6)   | 369 (31.2) | 24.6 |  |  |
| Right lower lobectomy   | 485 (15.7) | 254 (21.3) | 5.6  |  |  | 254 (21.5) | 164 (13.9) | 7.6  |  |  |
| Left upper lobectomy    | 767 (24.9) | 288 (24.2) | 0.7  |  |  | 288 (24.3) | 262 (22.1) | 2.2  |  |  |
| Right upper lobectomy   | 946 (30.7) | 469 (39.4) | 8.7  |  |  | 469 (39.6) | 317 (26.8) | 12.8 |  |  |
| Middle lobectomy        | 266 (8.6)  | 95 (8)     | 0.6  |  |  | 95 (8)     | 72 (6.1)   | 1.9  |  |  |

L-SMLND = lobe-specific mediastinal lymph node dissection; IQR = interquartile range; CCI = Charlson Comorbidity Index; ThRCRI = Thoracic Revised Cardiac Risk Index; COPD = Chronic obstructive pulmonary disease; SDM = Standardized mean difference. \* Statistically significant ( $p < 0.05$ ).
